# Supplementary material for: Patient-Centered Care in Breast Cancer Genetic Clinics
Source: Int J Environ Res Public Health. 2018 Feb 12;15(2):319. doi: 10.3390/ijerph15020319 (PMC5858388; doi:10.3390/ijerph15020319)
Supplement: Supplementary file 1 [file ijerph-15-00319-s001.pdf]

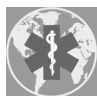

## Supplementary Materials

**Table S1.** Literature search and article selection.

| Literature Review on Period from 2000 to August 2017 (Last Check on 17/10/2017)                                                                                                                                                                                                                                                                                                                                                                                                                                                                                                                     |
|-----------------------------------------------------------------------------------------------------------------------------------------------------------------------------------------------------------------------------------------------------------------------------------------------------------------------------------------------------------------------------------------------------------------------------------------------------------------------------------------------------------------------------------------------------------------------------------------------------|
| Keywords:                                                                                                                                                                                                                                                                                                                                                                                                                                                                                                                                                                                           |
| ((((((((genetic counseling) OR genetic testing) OR genetic predisposition)) AND ((breast neoplasm*) OR ovarian neoplasm*)) AND (((((((psychology(MeSH Subheading)) OR psychological adaptation(MeSH Terms)) OR need*(MeSH Terms)) OR unmet need*(MeSH Terms)) OR emotion*(MeSH Terms)) OR concern*(MeSH Terms)) OR quality of life(MeSH Terms) OR difficult*[MeSH Terms)) OR health service need*(MeSH Terms)))) AND ( "2000/01/01"(PDat) : "3000/12/31"(PDat) ))) AND (((questionnaire(MeSH Terms)) OR measure*(MeSH Terms)) OR scale(MeSH Terms)) AND ( "2000/01/01"(PDat) : "3000/12/31"(PDat))) |

Table S2. Study characteristics.

| First Author     | Year | Country     | Objective                                                                    | Study Design                       | N (% Response Rate) % Female | Age Mean (SD) (Range) | Period (Time Since Counselling/Testing)                              | Hereditary Syndromes; Healthy or Affected        | Psychosocial Needs Measure                                                                                                                                  | Other Measures                                                |
|------------------|------|-------------|------------------------------------------------------------------------------|------------------------------------|------------------------------|-----------------------|----------------------------------------------------------------------|--------------------------------------------------|-------------------------------------------------------------------------------------------------------------------------------------------------------------|---------------------------------------------------------------|
| Bennett          | 2012 | UK (Wales)  | To assess detailed concerns and coping                                       | Longitudinal prospective           | 194 (64% RR) 86% female      | 47.5 (13.5)           | Before + 1 month after pre-counselling/before result disclosure      | Partly HBOC/HNPCC % affected not provided        | GRACE (Concerns)                                                                                                                                            | GRACE (Coping)                                                |
| Bjornsett        | 2015 | Norway      | To identify the women most vulnerable to experiencing psychological distress | Cross-sectional                    | 354 (67% RR) 100% female     | 62.6 (11)             | 31 (18) months after testing                                         | Affected with ovarian cancer (100%)              | MICRA (Distress: $\alpha = 0.90$ ; Uncertainty: $\alpha = 0.81$ ; Positive experience: $\alpha = 0.81$ – confirmatory factor analyses adequate fit indices) | HADS, IES                                                     |
| Eijzenga         | 2015 | Netherlands | To assess the prevalence and determinants of psychosocial problems           | Cross-sectional                    | 137 (52% RR) 82% female      | 47 (11)               | Prior to genetic counselling (most)                                  | Various hereditary syndrome; 71 (52%) affected   | PAHC (Positive case if $\geq 1$ item in a domain rated $\geq 3$ )                                                                                           | DT, HADS                                                      |
| Farrelly         | 2013 | Australia   | To identify variables that predict levels of unmet need                      | Cross-sectional                    | 299 (45% RR) 100% female     | 46 (13.9)             | 1.7 (1.5) year after BRCA1/2 positive test disclosure                | Affected breast (37%), ovarian (6%), both (1.4%) | Modified version of Thewes et al. (2003) nine-item scale ( $\alpha = 0.93$ )                                                                                | IES                                                           |
| Halbert          | 2011 | USA         | To assess the long-term reactions to BRCA1/2 testing                         | Cross-sectional                    | 167 (46% RR) 100% female     | 54.2 (9.8)            | 7.2 (2.2) years since test result                                    | Affected breast cancer (50%)                     | MICRA (Distress: $\alpha = 0.87$ ; Uncertainty: $\alpha = 0.84$ ; Positive experience: $\alpha = 0.82$ )                                                    | None                                                          |
| Lumish           | 2017 | USA         | To assess impact of panel gene testing in HBOC patients                      | Cross-sectional                    | 232 (63% RR) 97% female      | 48.7 (12.8)           | Months after testing: 13.3 (6.7) (affected); 12.5 (6.3) (Unaffected) | Affected breast or ovarian cancer (56%)          | MICRA No psychometric information                                                                                                                           | IES, Satisfaction With Decision, Scale of Ambiguity Tolerance |
| Oberguggenberger | 2016 | Austria     | To assess psychosocial outcomes and counselee satisfaction                   | Cross-sectional case-control study | 137 (42% RR) 94% female      | 46.8 (12.7)           | After counselling: 1.8 (0.9) year; 69% decided for testing           | 53% affected with cancer                         | MICRA (Scales $\alpha = 0.6$ – $0.81$ )                                                                                                                     | HADS, CWS, Satisfaction/Counselling/Decision, SF-12           |

MICRA: Multidimensional Impact of Cancer Risk Assessment; HBOC/HNPCC: Hereditary Breast and Ovarian Cancer/Hereditary Non-Polyposis Colon Cancer; GRACE: Genetic Risk Assessment Coping Evaluation; HADS: Hospital Anxiety and Depression Scale; CWS: Cancer Worry Scale; PAHC: Psychosocial Assessment in Hereditary Cancer; DT: explanation; IES: Impact of Event Scale.

**Table S3.** Measure characteristics as provided by the original developmental or psychometric study.

| Measure                                                               | Aim-Targeted population                                                                                                     | Number of items/scale-Domains                                                                                                                                                                                                                                                                                                                                                                          | Development-Psychometrics                                                                                                                                                                                                                              | Scoring-Data analysis                                                                                                                                                                                                                                                                                                   |
|-----------------------------------------------------------------------|-----------------------------------------------------------------------------------------------------------------------------|--------------------------------------------------------------------------------------------------------------------------------------------------------------------------------------------------------------------------------------------------------------------------------------------------------------------------------------------------------------------------------------------------------|--------------------------------------------------------------------------------------------------------------------------------------------------------------------------------------------------------------------------------------------------------|-------------------------------------------------------------------------------------------------------------------------------------------------------------------------------------------------------------------------------------------------------------------------------------------------------------------------|
| Multidimensional Impact of Cancer Risk Assessment, MICRA Cella (2002) | To measure specific impact of result disclosure after genetic testing - Women tested for <i>BRCA1/2</i> mutation            | 25 items, incl. sections relevant when having children (two items) or having cancer (two items) - three scales: distress (six items), uncertainty (nine items), positive experience (four items) and two single items                                                                                                                                                                                  | IRT-based Rasch sequential residual factor analysis - scales (internal consistency): distress ( $\alpha = .86$ ), uncertainty ( $\alpha = .77$ ), and positive experiences ( $\alpha = .75$ ); differentiate between groups with different test result | Four-level Likert scale (never, rarely, sometimes, often) scored respectively 0, 1, 3 and 5; Sum of scores per scale and 21-item, raw or transformed (0–100) scores                                                                                                                                                     |
| Support needs questionnaire Farrelly (2013)                           | To assess level of unmet need - Women carriers of <i>BRCA1/2</i> mutation                                                   | 16 items/one scale: information need about risk-reducing surgery and screening, communication with family members, social support, and psychological needs                                                                                                                                                                                                                                             | Adapted from existing unmet needs questionnaires (Thewes, 2003); 16-item (internal consistency): $\alpha = 0.93$                                                                                                                                       | Five-point Likert scale (1 = no need, 2 = low need, 3 = moderate need, 4 = high need, 5 = very high need). Coded no need versus any need (low to very high); number of any need per woman                                                                                                                               |
| Genetic Risk Assessment Coping Evaluation, GRACE Phelps (2010)        | To assess concerns and coping responses - between referral into clinical genetics service and notification of level of risk | 11 items + open-ended 'other' (sources of stress) - degree of worry in response to each source and eight (and one other) coping strategies used to cope with each                                                                                                                                                                                                                                      | Preliminary descriptive data. Relations between worries and coping strategies                                                                                                                                                                          | 4-point Likert scale - degree of worry (0=not at all/not applicable, 1 = a little, 2 = quite a bit, 3 = very much so). Dichotomous coding for coping strategies (absence/presence). Proportion of participants reporting level of worry about each potential source of stress and proportions of coping strategies used |
| Psychosocial Assessment in Hereditary Cancer, PAHC Eijzena (2014)     | To assess specific psychosocial problems related to cancer genetic counselling - Any hereditary cancer syndrome             | 26 items + open-ended 'other' - six domains: Hereditary predisposition (5); Practical issues (2); Family and social issues (6); General emotions (5); Living with cancer (5); and, for those who have children children-related issues (3) (only applicable to respondents having children) + 1 item on need for extra service by domain ("Would like to receive professional psychosocial support ?") | Development based on the European Organisation for Research and Treatment of Cancer Quality of Life Group guidelines. Screening properties of cut-off established against clinical interview                                                           | Four-point Likert scale - degree of difficulty (1 = not at all, 2 = a little, 3 = quite a bit, 4 = very much). Need for extra service (Yes/No). Prevalence by problem domain using cut-off $\geq 3$ in at least 1 item by domain. Number of domains of needs                                                            |

MICRA: Multidimensional Impact of Cancer Risk Assessment; GRACE: Genetic Risk Assessment Coping Evaluation; IRT: Item Response Theory; PAHC: Psychosocial Assessment in Hereditary Cancer; *BRCA1/2*: genes.
